# Supplementary material for: Harleß’ Apparatus of Will: 150 years later
Source: Springer Nature journal article supplement (doi:10.1007/s00426-011-0362-3), 2011-07-11
Supplement: MOESM1 [file 521614]

---

# *Der Apparat des Willens*

— — —

# *The Apparatus of Will*

Translated from: Harleß, E. (1861). *Der Apparat des Willens*. *Zeitschrift für Philosophie und philosophische Kritik*, 38(2), 50-73.  
by Roland Pfister and Markus Janczyk, Julius-Maximilians-University of Würzburg. See Notes for contact details.

---

*„Der angeborenen Farbe der Entschließung  
Wird des Gedankens Blässe angekränkt.“*

Hamlet

Nachdem das Band zwischen Philosophie und Naturforschung längst wieder geknüpft ist, bedarf es an sich keiner Entschuldigung, wenn ich als Physiologe die geneigten Leser dieser

*“And thus the native hue of resolution  
Is sicklied o’er with the pale cast of thought.”*

Hamlet

## **1. The foundations of voluntary action**

Since the bond between philosophy and natural science has long been re-established, in fact, there is no need for me

Blätter mit einem Thema vertraut zu machen suche, welches an der Grenze der empirischen Forschung liegt. Wenn ich gleichwol nicht umhin kann vorzubemerken, daß ich dazu durch die Aufforderung der sehr verehrten Redaktion dieser Zeitschrift unmittelbar veranlaßt wurde, so geschieht dies in Ermanglung der Personalkennntniß eines Leserkreises, von welchem ich nicht von vorneherein voraussetzen konnte, daß er in allen seinen Gliedern sich mit gleicher Lebhaftigkeit für den physiologisch-psychologischen Mechanismus interessieren würde. Aus dem gleichen Grund werde ich es auch versuchen, mein Thema von der Basis allgemeinsten physiologischer Voraussetzungen aus zu behandeln.

Die Schwierigkeit des Gedankens eines unmittelbaren gegenseitigen Aufeinanderwirkens der geistigen und leiblichen Realelemente darf ich durch die Arbeiten Fichte's und Lotze's als gehoben betrachten. Es erübrigt sich somit nur die formellen Bedingungen darzulegen, unter welchen eine willkürliche Bewegung zu Stande kommt.

Bei Betrachtung der willkürlichen Bewegungen fällt ihrem Begriffe nach die der unwillkürlichen Bewegungen scheinbar ganz aus der Reihe; gleichwol aber muß diese den Ausgangspunkt jener bilden; denn so bestimmt der Begriff einer willkürlichen Bewegung zu stehen scheint, so unbestimmt ist er in der Wirklichkeit. Das Maaß der Freiheit einer Bewegung bestimmen wir nicht nach einem äußerlichen Kriterium ihrer Form, sondern durch die Vergleichung ihres Auftretens mit der Erkennbarkeit ihrer veranlassenden Ursache. Je inniger und selbstverständlicher der Zusammenhang beider scheint, desto zuverlässiger sagen wir: „es konnte nicht anders geschehen“, und drängen damit jemehr den Gedanken an die Freiheit gegen den an die Nothwendigkeit. Den Druck der veranlassenden Ursache schätzen wir nach dem Maaßstab unserer eigenen Widerstandsfähigkeit, und verlegen ihren Ausgangspunkt um so tiefer in das innerste Wesen des Geistes, je weniger weit unsere Erkenntnis der Mittel reicht, durch welche nach mechanischen Gesetzen die Bewegung mit Nothwendigkeit erfolgt. Es ist

as a physiologist to justify my present aim of acquainting the reader with a topic that is located at the very frontiers of the empirical sciences. Even though I was invited by the honoured editorial office of this journal to do so, I have to mention my lack of knowledge about the readership and the fact that I cannot take for granted that each individual reader is interested in the physiological-psychological mechanisms with the same vividness as I am. For the same reason, I will try my best to treat the present topic based on the most general physiological premises.

The difficulty of imagining an immediate reciprocal influence of psychological and somatic entities has already been sufficiently elaborated in the work of Fichte and Lotze.<sup>1</sup> Consequently, the present article is dedicated to only setting forth those formal conditions that give rise to voluntary action.<sup>2</sup>

When considering voluntary actions in general, the term of involuntary actions does not seem to have a place in the discussion. Yet, the latter actions have to be the starting point for the former, since the seemingly well-defined concept of voluntary action is in reality nothing but vague. A given movement's degree of voluntariness cannot be judged on the basis of an external criterion depending on its appearance, but only by comparing its occurrence with its apparent and perceivable cause. The more intimate and the more inevitable this relation, the more confident we will say: "it could not have been any different" and we will trade-off the thought about voluntariness with the thought about necessity. We judge the impact of an apparent cause depending on our own potential resilience and displace the source of the movement all the more into the innermost essence of our soul, the fewer we know about those factors that will bring about the observed movement inevitably and by the mere necessity of mechanical laws. It is by no means challenging to hide from a child the strands and wires that move a puppet and to present those puppets as voluntarily

nicht schwer einem Kind die Fäden und Drähte zu verbergen, mit welchen die Marionetten bewegt werden, und ihm die Puppen als willkürlich sich bewegende Wesen vorzuführen, und heute noch glauben Viele an die willkürlichen Bewegungen der Schwärmosporen und Samenfäden. Der Entscheid, ob frei oder nothwendig, hat also nie eine einfache objective Basis, sondern beruht auf Werthschätzung der Ursachen und Kenntniß der zur Handlung führenden geistigen und mechanischen Zwischenglieder.

Der gewöhnliche Wortbegriff setzt für die Freiheit der Bewegung die Unabhängigkeit ihres Ausgangspunktes von einem Zwang durch mechanische Zwischenwirkungen voraus. Erfolgt eine That durch den Zwang der Consequenz logischer oder ethischer Werthbestimmungen, so bleibt sie darum noch eine freie. Das innere, subjective Kriterium bildet somit die Ueberzeugung, daß wir so oder ebensogut auch entgegengesetzt hätten handeln können, wenn wir der Veranlassung einen anderen, durch das innerste Wesen des Geistes selbst, also frei bestimmbaren Werth beigelegt hätten. Mit Recht verlangen wir für jede Handlung ein Motiv, wie für jedes **actum** überhaupt ein **agens**. Wir setzen bei der willkürlichen Bewegung eine wenn auch noch so rasch verlaufende Kette untereinander nach den Gesetzen des vernünftigen Denkens verknüpfter Vorstellungen voraus, und verlangen als Beweis für die Willkühr: die Selbstständigkeit der Wahl in den Mitteln eine Absicht zu erreichen, wodurch der im Motiv liegenden Forderung Genüge gethan wird. Da nun jede Wahl eine Distinktion, jede Distinktion ein Wissen von Unterschieden und dieses selbst allgemein Bewußtseyn voraussetzt, so werden bewußte, zweckmäßige und willkürliche Bewegungen als synonyme Begriffe häufig zusammengeworfen. Nun kann man sich aber zum Oeftesten überzeugen, daß viele Bewegungen ganz unbewußt auftreten, welche für den Beobachter den Schein der Zweckmäßigkeit an sich tragen, weil Ursache und Folge für seinen Gedankengang einen vernünftigen Zusammenhang zeigen. Wenn Jemand das Gleichgewicht verliert, und im Wanken den Arm ausstreckt um nicht auf die Nase

moving beings. And even today, many believe spores and filaments to be able to move voluntarily. The decision whether an action is 'voluntary' or 'necessary' thus never has an unambiguous objective basis, but can only be based on the subjective assessment of the causes of an action and the corresponding knowledge about connecting psychological and mechanical links.

### 1.1. Voluntariness, consciousness, and purposefulness

The common term "voluntariness" presupposes that a movement is by no means the necessary consequence of mere mechanical factors. If a movement, however, is enforced by consequences of logical or ethical considerations, it is still to be considered voluntary. The internal and subjective criterion is thus the belief that we could have acted this way, but also entirely contrary – if only we had assigned a different value to the action by the innermost essence of our soul, that is, a freely chosen value. Rightly so do we ask for a motive for each action, just as we demand for an **agens** behind each **actum**. For each voluntary action, we assume a chain of processes which might follow in the most rapid succession and which are connected by the laws of sensible thought. As a proof for voluntariness, we then demand the following: the autonomous and free choice between several means to achieve a given end. And since every choice implies a distinction, and every distinction implies knowledge about differences which, in turn, implies a conscious representation, the concepts of conscious, purposeful, and voluntary actions are often used synonymously. Yet, one can frequently observe that many actions occur unconsciously, but still come with the impression of purposefulness to the observer, as cause and effect are connected in a reasonable way. If, for example, somebody loses his or her balance and raises the arm to prevent falling, this behaviour appears purposeful when he or she stays unharmed. However, we doubt the purposefulness of the action when his or her arm

zu fallen, so scheint das ganz zweckmäßig, wenn er dabei mit heiler Haut davon kommt; wir zweifeln aber an der Zweckmäßigkeit, wenn er sich zwar nicht den Kopf, aber die Hand dabei verletzt, und wir werden das ganze Manöver vollkommen zweckwidrig finden, wenn wir überlegen, daß er ganz leicht das Gleichgewicht durch einen veränderten Schritt hätte wieder herstellen können, ohne weder auf die Hand, noch das Gesicht zu fallen. Wir sehen aus diesem einen Beispiel, daß bewußte wie unbewußte, willkürliche wie unwillkürliche Bewegungen den Schein der Zweckmäßigkeit haben können; daß willkürliche Bewegungen ebenso zweckmäßig als zweckwidrig seyn können, daß bewußte Bewegungen ebenso willkürlich als unwillkürlich seyn können.

Schätzt man nach der Zweckmäßigkeit die Freiheit des Handelns, so bedarf es nur geringer Ueberlegung um einzusehen, daß dies gerade der trüglichsste Maaßstab ist, ja daß man consequenter Weise von der Zweckmäßigkeit auf die Unfreiheit schließen müßte. Denn von den innersten, der Voraussetzung nach freien Motiven des Geistes weiß der Beobachter am allerwenigsten; sind sie doch dem Subject selbst oft unklar genug! Der Beobachter vergleicht den Erfolg einer Handlung mit der ihm überhaupt erkennbaren Veranlassung; daß diese zuletzt immer eine entferntere äußerliche seyn wird, ist klar. Der Zweck wird am bestmtesten erfüllt scheinen, und die Zweckmäßigkeit der Handlung, in den weitesten Kreisen anerkannt werden, wenn die beachtete äußere Veranlassung ihrer Natur nach als eine solche angesehen wird, welche allgemein gültigen Schlüssen zufolge als Consequenz die wirklich ausgeführte Handlung mit sich bringt; wenn sich diese, wie man sagt, „von selbst versteht.“ Die aus der allgemeinen geistigen und leiblichen Eigenschaft der Menschen entspringende Consequenz bestimmt die Zweckmäßigkeit der Handlung des Menschen. Freiheit im Handeln betrachten wir aber als ein Gut des Individuums. Aeußerung allgemein gültiger Consequenzen könnte also gerade umgekehrt viel mehr als ein Zeichen der Unfreiheit, denn als ein Zeichen der Freiheit aufgefaßt werden; und in der That

gets wounded in the course of the action; and we will judge the whole manoeuvre to be absurd when considering that he or she could easily have restored balance just by a single sidestep without falling on the hand or head. What we learn from this one example is that conscious as well as unconscious, voluntary as well as involuntary movements may appear purposeful; that voluntary movements may be purposeful or not; that conscious movements may be voluntary as well as involuntary.

### **1.2. Voluntariness is not equal to purposefulness but still related to the outcome of an action**

Judging the voluntariness of an action based on its purposefulness is the most delusive criterion of all; it even seems that, to be consequent, one would have to judge any purposeful action to be involuntary. After all, the observer does not know anything about the innermost and – by definition – free motives of the mind; even for the agent himself, these motives are often enough far too cloudy! The observer compares the success of an action with those causes that are perceivable from his point of view; and it is clear that these perceivable causes have to be exogenous stimuli in the environment. Thus, the purpose of an action will be most apparently fulfilled and widely accepted if the perceived external cause is generally assumed to give rise to the executed action, i.e., when the executed action “goes without saying” following the external cause. The same holds true for the perceived purposefulness of this action. To conclude, the purposefulness of a human action derives from the consequence of psychological and somatic attributes of the human being. Being able to base one’s actions on free, i.e., voluntary, decisions is commonly seen as a privilege of the individual. Actions based on universal consequences, in contrast, could even be seen as a sign of involuntariness rather than voluntariness. In fact, pure materialism would

würde der Materialismus eine sehr breite Basis haben, wenn alle Menschen allerwärts allgemein zweckmäßig handelten. Daß sie aber unzweckmäßig handeln können, bezeugt ihre Freiheit; nie können wir die Zweckmäßigkeit für sich als Zeichen der Freiheit betrachten.

Die Freiheit des menschlichen Willens documentirt sich nicht durch die zweckmäßige Verknüpfung der Mittel, um der Forderung irgend einer Veranlassung allgemein befriedigendes Genüge zu thun, sondern in der Wahl der Zwecke, welche er erfüllen will. Die kunstreichsten Handlungen der Thiere sind nicht deswegen frei, weil sie überhaupt um eines erkennbaren Zweckes willen ausgeführt werden, wodurch sie sich im Gegenteil ihrer der Gattung allgemein gestellten Aufgabe gegenüber als individuell unfrei erweisen, sondern nur in ihren einzelnen Momenten, und zwar deswegen, weil ihnen eine Wahl zwischen den Mitteln bleibt, mit welchen sie zu dem stets gleichen Zweck gelangen. Der Trugschluß von der vermeintlichen oder erkennbaren Zweckmäßigkeit auf die Freiheit eines Willens, welcher nach ihrem Ideal handelt, hat in die Theorie der sogenannten Reflexbewegungen unsägliche Verwirrungen gebracht. Die Mittel, zwischen welchen zur Erreichung eines Zweckes gewählt werden kann, sind endlich und bei dem Menschen individuell beschränkt; in dieser Beziehung ist die Freiheit des Willens ebenfalls beschränkt. Die Wahl der Zwecke, welche sich mit den gebotenen Mitteln erreichen lassen, ist im Ganzen unendlich variabel, und die Freiheit des menschlichen Willens überhaupt sicher so ausgedehnt, als die Aufgabe des Menschengeschlechtes verlangt. –

Das ungetrübte Bewußtseyn bei der Ausführung einer Handlung macht den Menschen **in praxi** verantwortlich für die That. Es ist also von juridischem Standpunkt aus bewußte und willkürliche Handlung identisch. Da wir bis jetzt schon darauf hingedeutet haben, daß eine im Sinne irgend eines Zweckes ausgeführte Bewegung deshalb, weil wir ihre Zweckmäßigkeit anerkennen zu müssen glauben, noch nicht willkürlich zu seyn braucht, so sehen wir, daß es Bewegungen geben kann, welche

have a strong base if all people all over the world acted universally purposeful. The very fact that people are able to not act purposefully, however, proves their free will. Under no circumstances can we treat purposefulness as a sign for voluntariness.

Human free will is not evident in the purposeful combination of different means to reach a prescribed end, but in choosing the end the actor wants to achieve. Even the most elaborate and daedal behaviours in the animal kingdom are not free for the reason that they are performed for a perceivable purpose. To the contrary, when considering the phylogenetic role of a species, these behaviours will even appear individually involuntary rather than free. However, animal behaviour might appear voluntary in its single instances when there is a choice between several means to reach the ever identical end. The fallacy of inferring voluntariness and a free will from assumed or perceivable purposefulness has brought unspeakable confusion to the theory of reflex movements. The means one can choose from to reach a given end are limited in number and vary between individuals, and the freedom of the will is limited due to this very fact. The choice between those ends that are attainable with the available means is altogether infinitely variable. And the freedom of human will itself is certainly as vast as required by the greater role of humankind. –

### 1.3. Voluntariness is not equal to conscious awareness

The unclouded and conscious awareness of performing an action **in praxi** ascribes the liability for this action to the acting human agent. Thus, from a juridical point of view, conscious and voluntary actions are identical. We have already pointed out that actions pursuing any given purpose are not necessarily voluntary, even if we have to acknowledge their purposefulness. Following the same line of argument, we can easily see that purposefulness might mislead

eben wegen ihrer Zweckmäßigkeit aus einer bewußten Ueberlegung hervorzugehen scheinen können, ohne daß der Impuls für sie wirklich darin zu liegen braucht.

Ganz allgemein gültige Forderungen einer Veranlassung zu Handlungen überheben den Einzelnen der Verantwortung für sie, wenn die Mittel fehlen selbstständig die Forderung zurückzuweisen. Die Aeußerung des individuellen Willens besteht also sowohl in der selbstständigen Anregung zu einer Bewegung, als in der Zulassung einer nicht von ihm hervorgerufenen. Im letzteren Fall ist die Bewegung unwillkürlich, und erfolgt in Beziehung auf die Verkettung von Veranlassung und Folge unbewußt. Das Bewußtseyn bleibt dabei ein passiver Zuschauer. Es kann also vom Begriff des Gattungsbewußtseyns aus zweckmäßige und doch unwillkürliche und individuell bewußte Bewegungen geben.

Mit dem intensivsten Eindruck der Willkühr sind deshalb die mit Bewußtseyn ausgeführten allgemein zweckwidrigen, oder zwecklosen, überhaupt „zufälligen Bewegungen“ behaftet, wie wir sie fortan nennen wollen. Bei ihnen fällt für die Beobachtung jede Spur einer irgend wie bestimmenden äußeren und dem Gattungsbewußtseyn verständlichen inneren Veranlassung weg und sie erscheinen ihr deshalb direkt aus dem innersten, selbstbestimmenden Impuls des Individuums hervorgegangen.

Von diesen zufälligen Bewegungen muß bei der Analyse der willkürlichen ausgegangen werden, man mag dem Willen den größten oder gar keinen Einfluß zuschreiben.

Ist nemlich der Erfolg der äußeren Anregung abhängig und allein abhängig von einer Punkt für Punkt innerhalb des Stofflichen fortschreitenden Bewegung, so kann die unendliche Mannichfaltigkeit im Erfolg einer einzelnen, als Motiv der Handlung betrachteten Anregung aus der gleichzeitigen Wirkung einer unendlich variablen Zusammenstellung mit anderweitigen Anregungen betrachtet werden. Indem man aus der ganzen Summe solcher in einem Moment gegebenen Anregungen eine herausgreift, und diese aus irgend welchen Grün-

us to judge movements as the result of conscious reasoning, even though the true impulse for these movements is not necessarily conscious.

However, an individual cannot be held responsible for an action generally assumed as a consequence of a given cause when there are no means to autonomously refuse the action. The individual will is expressed through both, the autonomous initiation of an action and permitting those actions that are not initiated voluntarily. In the latter case, the action is involuntary and, regarding the relationship of cause and effect, unconscious: Consciousness stays a passive spectator. Regarding the human *Gattungsbewußtseyn*<sup>3</sup>, there can thus be purposeful actions that are at the same time involuntary, but conscious, to the acting individual.

To sum up, the most intense impression of voluntariness arises from those actions that are performed consciously but at the same time do not serve any apparent purpose and might even be detrimental regarding a phylogenetically defined purpose. We will refer to these actions as “incidental actions” henceforth. For these incidental actions, we can neither perceive external nor phylogenetically plausible internal causes. That is why they seem to originate from the innermost, self-contained impulse of the individual.

These incidental actions have to be the first step in any comprehensive analysis of voluntary actions, either acknowledging the most pronounced impact of the will or no impact of it at all.

## 2. The physiology of incidental actions

For the following argument, we assume the success of an external activation to depend entirely on a chain of physical events that is processed step by step. If this assumption holds, the manifold number of potential outcomes of an activation that we consider to be the motive of an action can be seen in the context of an unlimited number of concurrent activations which themselves take their own effect. Choosing any single activation out of the total activation

den für die motivirende betrachtet, entsteht wegen der unendlichen Mannichfaltigkeit der Handlungsweisen verschiedener Individuen gegenüber der supponirten Anregung der Schein der Willkühr. Ebenso scheint eine freie Wahl deswegen gestattet, weil bei ein und demselben Individuum dieselbe als Motiv zu Handlung betrachtete äußere Anregung im Wiederholungsfall ganz andere Bewegungen veranlaßt als früher. Nach dieser Ansicht, welche die Freiheit des Willens leugnet, ist dessen Annahme darauf entstanden, daß man einseitig die einzelne sinnenfällige Anregung als constant, und den Effekt als variabel betrachtet hat, während in der Wirklichkeit letzterer immer nur variirt ist im Sinne der Variation der Anregung, welche sich aus der supponirten und der ganzen Summe anderweitiger, aber versteckter Anregungen gemeinschaftlich zusammensetzt.

Die außerordentlich große Anzahl von Uebergangsstellen und Verbindungswegen zwischen nervösen Apparaten, von welchen ein Theil die Erregungen von außen central leitet, während der andere die Folgen der Erregung nach außen auf die Bewegungsorgane überträgt, gestattet hiernach einen Abfluß der von außen kommenden Erschütterung nach allen erdenklichen Richtungen. Daß in den einzelnen Fällen aber doch nur bestimmte Handlungen erfolgen, hängt einerseits davon ab, daß gleichsam durch Gegenströme, welche von gleichzeitig erregten Punkten ausgehen, viele Bewegungen aufgehoben werden, also nur bestimmte Bewegungsformen zu Tage treten; daß ferner vorausgegangene Bewegungen in den Centralorganen, als Stöße gedacht, bestimmte Wege gangbarer gemacht haben, wenn sich die Gesammtform der Anregung häufiger wiederholte; daß endlich gewisse Residuen vorausgegangener Veränderungen im Gehirn als weitere Modificationen der äußeren, in einem Moment gegebenen Anregungen mitwirken. Da von dem Allen der Beobachter nichts erkennen kann, als vielleicht eine der vielen veranlassenden Ursachen, so muß ihm die ihr folgende Bewegung als willkührlich erscheinen, obwohl sie in der That ebenso zwangsmäßig auftritt wie

that is present at any given moment, and further considering this activation – for whatever reasons – as the motivating activation, will inevitably give rise to the impression of voluntariness. This impression of voluntariness is thus caused by the unconstrained number of potential behavioural choices of an individual. This free choice is even more apparent when considering that repeated exposure of an individual to the same stimulation may give rise to completely different actions. However, this notion does not imply the concept of free will. To the contrary, it suggests that the notion of free will is based on the misleading assumption that the sensory activation is constant while the outcome is assumed to be variable. Yet, the outcome varies only in concert with its determining activation, which in turn comprises the external as well as the total of hidden additional activations.

The nervous apparatus consists of pathways that propagate external activations to the central areas and, vice versa, those pathways that relay the activations to the effectors. These pathways are characterised by a remarkable number of interconnections, allowing to project external activations into any imaginable direction. There are several reasons why particular patterns of activation always produce the same action. First, reverse projections which originate from simultaneously activated centres neutralise many potential actions, such that only several types of movements are evoked. Secondly, previously executed movements will inevitably pave their way within the central organs when the respective pattern of activity is repeated. Thirdly, some residues of previously experienced activity in the brain will inevitably modify the external activations that are present at any given moment. All these processes are not perceivable for the observer, except for probably one single potential cause for an observed action. This action will thus appear to be voluntary to the observer, even if the action in fact is as inevitable as the movement of a pair of scales when weights

die Winkelstellung des Waagebalkens bei einer bestimmten Differenz der aufgelegten Gewichte.

Hiernach wäre der Mensch ein nach dem Gesetz des Kräfteparallelogrammes auf seiner Lebensbahn fortgeschobener Mechanismus, ohne alle Verantwortlichkeit für sein Thun und Lassen.

Das in seiner praktischen Consequenz so widersinnige Theorem hätte auch bei Physiologen der exaktesten Richtung nicht so festen Fuß fassen können, wenn man nur eine Handhabe zu zeigen vermocht hätte, an welcher es dem an sich so gerne geglaubten „freien Willen“ möglich wäre, einen vorliegenden Mechanismus (die nervösen Apparate) wirklich nach eigener Wahl zu benutzen. Unser Bewußtseyn sagt uns aber nichts über Form, Lage, Ort, Verbindung der einzelnen Elemente des Mechanismus, nichts von unseren Nerven und Muskeln überhaupt; der ganze Mechanismus ist für unser Bewußtseyn so gut wie gar nicht vorhanden, und wir sollen die Fähigkeit besitzen, auf ihn mit jener Präcision einzuwirken, welche wir an der Kunstfertigkeit des Menschen oft in so hohem Grad anstaunen? Was nützen alle schlagfertigen Mechanismen, aus welchen das Nervensystem zusammengesetzt seyn soll, für alle erdenkbaren Fälle gleichsam mit Tasten versehen, wenn man keine Ahnung hat, wo die Tasten liegen? Gewohnheit, Uebung, Gedächtniß – was nützt das Alles ohne Direktion für den Willen in jedem einzelnen Fall? Wir stehen vor einer Fabrik, wir sehen verschiedene Rohstoffe hineintragen, Produkte der verschiedenen Art herauskommen, hören vielleicht auch dann und wann ein Zischen und Schnarren, aber sehen nichts von der Maschine; was nützte es uns, hundertmal Wollsäcke hinein-, Tuchballen herausbefördern zu sehen, wenn wir nicht einmal wüßten, wo der Anfang der Umänderung des Rohstoffes in das Fabrikat durch die Maschine gemacht wird, und wo wir etwa die Wolle nur blindlings hinzuwerfen hätten, um sie als Tuchstreifen am anderen Ende wieder zu Gesicht zu bekommen.

Gerade so verhalten wir uns aber mit unserem Bewußtseyn der willkürlichen Handlung gegenüber. Wir gewahren den

of a given difference are applied.

Such reasoning implies seeing the human being merely as a machine that is controlled by the laws of the parallelogram of forces for his entire life – without any responsibility for his deeds.

Being paradoxical in its practical consequences, this theorem would not have gained such a strong foothold even for physiologists of the most mechanistic school, if only it was possible to show a single case where the appealing concept of “free will” was indeed able to use the existing mechanics (the nervous apparatus) to realise its own choice. Our consciousness, however, does not tell us anything about shape, orientation, location, and connections of individual elements of this (neural) mechanism. Nor does it tell us anything about our nerves and muscles; the entire mechanism is virtually non-existent for our consciousness. And against this background: We shall indeed be able to control these mechanics as aptly as the virtuosity of the human abilities suggests? What is the use of all these adroit mechanisms that constitute the nervous system – offering buttons for any imaginable operation – if one has no clue where these buttons are located? Habits, training, memory – what can we achieve with these tools without a guiding line for the will in each specific case? We face a factory and observe how raw materials are hauled inside and how products of different kinds come out. From time to time we possibly hear some hushed fizzling and feel gentle vibrations, but we do not see anything of the machinery. What is the use of observing a hundred times how somebody hauls bags of wool inside the machine and observing the produced fabrics, if we are not even aware where the transforming process begins, and where to place the wool exactly to see it appearing as fabric somewhere else.

### **2.1. Action control by sensory imagination?**

However, this is exactly the way how our consciousness is related to voluntary action. We experience the raw mate-



Rohstoff der veranlassenden Anregung in Form einer empfundenen Vorstellung, und das Produkt der versteckten Fabrik in der Form der Vorstellung von der That. Das sollen die beiden einzigen Elemente seyn, mittelst deren der Wille den Mechanismus in seine Hand bekommt? Führt etwa die willkürlich erzeugte Vorstellung eines Reizes unmittelbar zur Bewegung, welche jener Reiz in Wirklichkeit einmal nach sich gezogen hatte? Wer hat ein so scharfes Gedächtniß, den veranlassenden Reiz mit allen anderen, in demselben Moment vorhanden wirksamen, aber ganz vernachlässigten Nebenreizen zu reproduciren? Und wenn auch! Schließe ich wirklich krampfhaft fest die Augen, wenn ich mir noch so lebhaft das blendende Licht der Sonne bloß vorstelle? Man sieht: dieses eine Moment reicht nicht aus.

Vielleicht das andere? Ich reproducire willkürlich das Erinnerungsbild an eine recht einfache Bewegung, welche ich öfter schon ausgeführt habe; ich gebe dem Bild alle erdenkliche Klarheit und Bestimmtheit; es sey zum Beispiel das Bild der geballten Faust. Entsteht nun wirklich die Bewegung? Nein! Die Hand bleibt ausgestreckt, ruhig, bewegungslos. Jetzt will ich die Faust machen und in demselben Augenblick geschieht es, ohne daß ich weiß wie und wodurch.

Es wäre in der That auch schlimm, wenn unsere Vorstellungen alle als Bewegungsreize und alle Phantasiebilder von früher ausgeführten Bewegungen sofort in neue Bewegungen umschlügen; wir würden uns an unseren Vorstellungen sehr bald zu Tode gezappelt haben. Immer kehrt also wieder die alte Schwierigkeit für die Erklärung zurück, wie man für eine gewollte Bewegung am Bewegungsapparat den geeigneten Anknüpfungspunkt findet. Müßte man dafür Kenntnisse zu Hülfe nehmen, welche der feineren Anatomie des Nervensystems, ihrer Angaben über Faserverlauf und Verknüpfung entlehnt wären, so würde man bei der großen Unsicherheit, welche auf diesem ganzen Gebiet herrscht, nur eine sehr schwache Basis gewinnen. Glücklicher Weise kann aber das ganze feine Gefüge des Hirns und Rückenmarkes so seyn wie wir es uns gegenwärtig

rial of an action-causing activation in the form of a sensory imagination and the product of the hidden factory in the form of an imagined action. And these two elements shall be the only constituents employed by the will in order to exert control of the entire apparatus? Is it really the case that a voluntarily evoked imagination of a stimulus immediately and inevitably leads to a movement that previously followed that stimulus? Who does possess such a detailed memory that he or she is able to reproduce the causing stimulus together with all the other simultaneously activated yet unattended ancillary stimuli? And even if! Do I really close my eyes desperately when merely imagining the bright light of the sun? It is apparent from these examples that this single momentum is not sufficient.

## 2.2. Action control by motor imagination?

What about the other possibility? Instead of reproducing the sensory antecedents of an action, I evoke the memory of a relatively simple movement that I have carried out a number of times. I try to evoke it as vividly and clearly as possible; for example, the image of a clenched fist. Does this cause the movement to be carried out? No! My hand stays open, calm, motionless. Now I decide to clench my fist and in this very moment it happens – and I do not know how and by what cause.

It would indeed be disastrous if all our imaginations turned into action-causing stimuli and if all anticipations of previously executed movements immediately caused new movements; we would instantly have floundered ourselves to death. Thus, the difficulty remains to find a proper handle for our motor system to evoke a desired movement. In order to find this handle, we could draw on findings on the detailed anatomy of the nervous system and the related descriptions of the orientation and connection of fibres. However, given the manifest uncertainty that is prevalent in the whole discipline, we would only gain a very weak foothold. Fortunately, the whole subtle structure of the brain and the

vorstellen, oder ganz anders – es leidet darunter das nicht, was ich im Folgenden vorzutragen gedenke, weil dabei überhaupt keine Stütze aus der feineren Anatomie, sondern bloß aus der gewöhnlichen Erfahrung und den Resultaten absolut feststehender Experimente benutzt wird.

Der ganze Willensakt setzt sich für unser Bewußtseyn aus einzelnen Empfindungsmomenten zusammen. Ich empfinde, was mich zur That veranlaßt; ich empfinde, was ich will; ich empfinde, daß ich will. Wie die gewollte Bewegung effectuirt wird, fließt unter Intervention mechanischer Bedingungen unmittelbar aus den Vorgängen, welche jene Empfindungen veranlaßt hatten, und von deren vermittelnden Processen ich wiederum nichts inne werde. Wir wissen, daß unser Nervensystem aus einer unzählbaren Menge von Verbindungsbewegungen besteht, auf welchen die organischen Grundlagen der Empfindungen mit den organischen Vermittlungsapparaten der Bewegungen in functionellen Zusammenhang gebracht sind. Vermöge dieses Zusammenhanges werden unausgesetzt Bewegungstendenzen angeregt, welche, auch ohne daß der Wille dabei beteiligt ist, zu wirklichen Bewegungen führen können, wenn die Combination der Anregungen geeignet und die Stärke ihrer Einwirkung nur groß genug ist. Stellenweise muß jener Zusammenhang inniger gedacht werden, weil der Ausschlag in Bewegung schwer oder gar nicht zu vermeiden ist, und er stellt dann in der That einen automatischen Mechanismus dar.

Man darf aber nicht annehmen, daß eine prästabilierte Verknüpfung solcher Mechanismen für die unzählliche Menge zweckmäßiger Bewegungen vorhanden ist, deren Tasten gleichsam nur niedergedrückt zu werden brauchten, um sie in Gang zu setzen. Vielmehr werden die Bewegungen auch in ihren einzelnen Elementen deckende Ausdrücke für die Concurrenz der in der Gesamtanregung gegebenen Elemente darstellen. Diese Elemente selbst sind aber nicht undenklich klein und einfach, sondern nur so weit organisch und unveränderlich gruppiert, daß sie zusammenfließende Empfindungs-

spinal cord may be structured just like we conceive it at present or completely different – what I am going to bring forward in the following will not be afflicted because I am not going to rely on the mentioned subtle anatomy, but will stick to ordinary experience and to the results of definitely established experiments.

For our consciousness, the entire experience of will is composed of individual sensory moments. I sense what prompts me to perform an action; I sense what I want; I sense that I want. How the desired movement is eventually addressed – by intervention of mechanical principles – is a direct consequence of the processes that were triggered by my sensations, while I won't notice anything of the intervening processes. We know that our nervous system consists of innumerable connecting pathways so that the organic bases of sensation have functional coherence with the organic basis of movements.<sup>4</sup> This functional relation results in a continuous activation of movement tendencies that may lead to proper movements if the combination of activations is suitable and the intensity of their impact is strong enough. This may happen even without involvement of the will. The mentioned relation has to be conceptualised as being more deeply when the movement is hard or even impossible to inhibit. In this case, the relation can be seen as a truly automatic mechanism.

One must, however, not assume a priori existing connections for the unlimited number of purposeful movements which allow triggering all these movements by simply pressing the respective key. Rather, every single element of a movement mirrors the current total activation. These elements, however, are not indefinitely small and simple, but only as much organic (i.e., hard-wired) and invariably arranged as is necessary to merge into a 'sensory entity' and a 'motoric entity'. Thus, we only regard them as elements of those mechanisms that are necessary to initiate a perception or a movement. For example, all nerve fibres in a muscle do

Ganze und Bewegungs-Ganze darstellen. Wir betrachten sie also nur als Elemente in Beziehung auf die Apparate, welche nothwendig sind, um eine Empfindung oder Bewegung überhaupt veranlassen zu können. So haben die in einem Muskel verbreiteten Nervenfasern einen combinirten centralen Heerd, dessen Reizung eine Totalwirkung aller Fasern in dem Muskel veranlaßt, in Folge dessen er eben die zur Bewegung geforderte Verknüpfung seiner Gesamtmasse ausführen kann. Ebenso basirt eine einfache Ton- oder Farbe-Empfindung und dergl. auf einer organisch combinirten Veranlassung, deren letzte Elemente das Bewußtseyn nicht unmittelbar weiter auseinanderbreitet.

Mit solchen Knotenpunkten organischer Anordnungen und deren Verknüpfung vermag die Seele in eine zu willkürlichen Intensitätsgraden gesteigerte Wechselwirkung einzugehen. Indem dies allgemein gilt, ist damit ausgedrückt, daß der Wille den sensitiven wie motorischen Nervencentren gegenüber in gleicher Weise thätig seyn kann. Unter Willen verstehe ich die aus dem Wesen des Geistes heraus variable Intensität der Wechselwirkung seines eigenen Substrates mit dem der nervösen Centren. Den motorischen Centren gegenüber wird das gewöhnlich Willensäußerung genannt, den sensitiven Centren gegenüber heißt man es Aufmerksamkeit; beides ist aber identisch, und nur durch den **terminus ad quem** unterschieden.

Wir wissen, daß wir aus allen den gleichzeitig in uns veranlaßten Empfindungen willkürlich und momentan bald die eine, bald die andere bevorzugen könne, so daß sie mit größerer Lebhaftigkeit vor unser Bewußtseyn tritt; und es bedarf dazu nicht eines Hin- und Herflatterns der Psyche, um sich gleichsam bald an dieser, bald an einer anderen Blume der immer neu aufsprießenden Empfindungsflora zu ergötzen. Hat man die dualistische Anschauung aufgegeben, und setzt voraus, daß die Seele da ist, wo sich Seelenthätigkeit äußert, so ist es einfach zu denken, wie ohne alles weitere Suchen die Intensität der Empfindung lokal durch den Willen gesteigert werden kann, sey es in dem Moment ihres Entstehens oder im Verlauf

share a common central point in the nervous system, and its stimulation propagates to all these nerve fibres. As a consequence the muscle will perform the required movement. Similarly, simple tone- or colour-sensations and so on are based on combinations of organic causes, the smallest elements of which are not consciously accessible.

### 2.3. Interactions of the will and the nervous system in the sensory and the motoric domain

With such nodes of organic elements and their interconnections the will is able to interact to a voluntarily chosen degree. Since this is a general contention, it implies that the will can interact with sensory or motor centres of the nervous system in the same manner. This varying degree of interaction with nervous centres is what I conceive as 'will'. Regarding the motor centres one typically refers this interaction to as 'volition', regarding the sensory centres one typically refers to the term 'attention'; in fact both are identical and only distinguished by the **terminus ad quem** (i.e., by the goal).

We all know that we can voluntarily give preference to one perception over others, and that we can even switch between those preferred stimulations rapidly, in order to experience this very perception all the more vividly; and it does not require a flattering soul to gloat over one flower and then the other flower within the overly and overly sprouting flora of sensations. Let us abandon the dualistic view<sup>5</sup> for a moment and further assume that the mind is located exactly where it manifests itself. Then it is easy to understand how the will can increase the intensity of a perception locally, be it in the moment of its emergence or during its decay. Moreover, all these perceptions – including those entirely endogenously envisaged – must give rise to further

ihres Abklingens, und wie überhaupt jede auch nicht von Außen veranlaßte Empfindung (Vorstellung) an dem Ort, wo sie durch äußere Veranlassungen primär hervorgerufen war, auch wieder Veranlassung zu tiefer greifender Wechselwirkung geben muß. Die solchergestalt willkürlich an einem Ort der centralen Nerven-elemente gesteigerte Erregung in der Form, wie sie primär die bestimmte Empfindungsqualität erweckt hatte, soll nun aber jetzt aus den von da aus nach allen Richtungen hin sich zerstreuen den Wirkungen auf die Bewegung-scentra den Weg finden, welcher schließlich zu einer ganz bestimmten Bewegungsform führt.

Könnten die motorischen Centra für sich etwas der Empfindung Analoges in dem Zustand des Geistigen veranlassen, so wäre wie für die Empfindung kein weiteres Zwischenglied zur Orientirung des Willens nothwendig. Da dies aber thatsächlich nicht der Fall ist, so hat man zuzusehen, wie sich aus dem Gang der Empfindungen der Wink für den Angriffspunkt des Willens auf der motorischen Seite des Nervenapparates herausentwickelt.

Zu dem Ende hat man aber den ganzen Gang zu verfolgen, auf welchem der Mensch endlich zum willkürlichen Gebrauch seiner Glieder gelangt. Denn wir wissen, daß dies nicht mit einemmal möglich wird, sondern daß wir dies erst lernen müssen. Lernen heißt hier aber nichts anderes, als allmähliches Orientiren in den dazu von der Natur gebotenen mechanischen Mitteln.

Um ein schnelleres Verständniß der Methode zu erzielen, nach welcher wir dies erreichen, habe ich das beifolgende Schema entworfen, welches uns nicht sowohl ein Bild von der wirklichen Anordnung in den nervösen Apparaten geben soll, als vielmehr eine rein fingirte Zusammenstellung der für die ganze Operation nothwendigen mechanischen Glieder.

Ich habe um das Centrum eine größere Gruppe motorischer Centralelemente gestellt, welche unter einander auf das Mannichfaltigste und Willkürlichste verbunden sind. Die innerste Kreis-peripherie soll die Totalität dieser unter einander

interactions at the location where they were primarily elicited. Such voluntarily enhanced activation somewhere in the central nervous system finally has to find the one and only correct path within the multitude of the diverging possible paths that eventually will give rise to a specific movement.

If motor centres themselves could produce an analogue to what one experiences via perception, then, similar to perception, no further connecting link would be required to orient the will. Since this is not the case, however, one's only possibility is to look for a contact point for the will within the stream of sensations in order to exert influence on the motor centres of the nervous system.

### 3. The acquisition of behavioural competence

Still one has to trace back the entire way that enables humans to use their limbs voluntarily. This is, as we know, not possible straightaway, but we have to learn this competence first. Here, however, learning means nothing but orienting oneself step by step in the opportunities given by mechanical means.

To facilitate the understanding of these learning processes, I developed the following schematic. This schematic is not meant to represent the true design of our nervous system, but rather to give an overview of those mechanical constituents necessary for the process.

The centre of the schematic contains several motor elements with various and arbitrary interconnections. This inner circle thus represents the total of interconnected motor

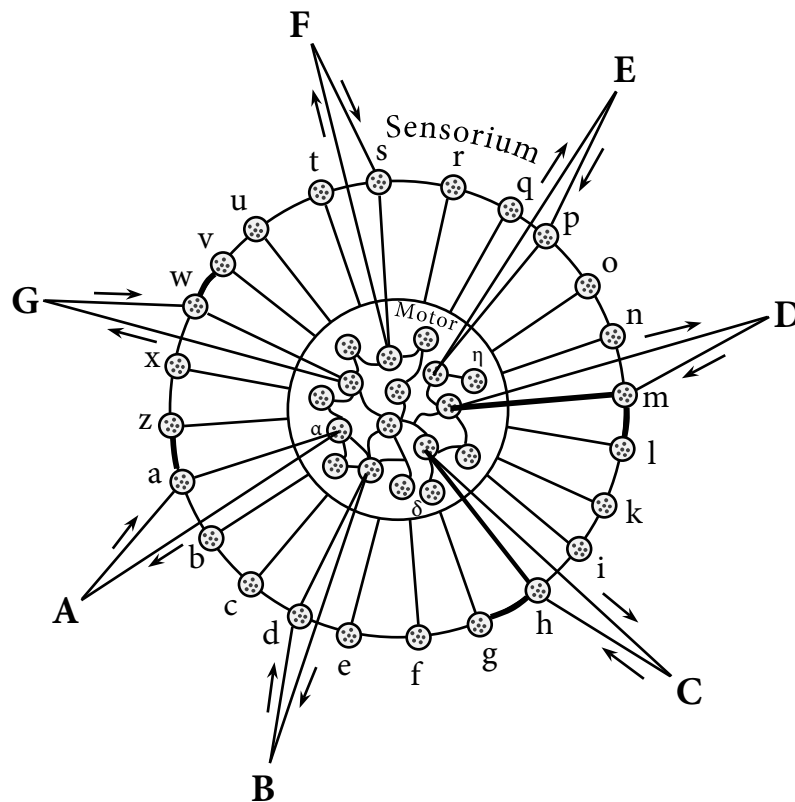

verknüpften motorischen Elemente als solche darstellen, von denen aus, im Gegensatz zu einer anderen Gruppe von Elementen direkt keine Empfindungen veranlaßt werden können. Auf die Peripherie des nächsten Kreises habe ich ein System solcher Elemente gestellt, welche Empfindungen veranlassen können, welche zugleich unter sich durch Stücke der Peripherie, und mit den Elementen des inneren Kreises durch die Radien in funktionelle Beziehung gesetzt sind. Wir können für beide Gruppen den Namen **motorium** und **sensorium** beibehalten, dürfen uns aber nicht denken, daß diese punktförmig irgendwo im Nervensystem zusammengedrückt sind, sondern daß sie sich überhaupt nur mit vielfacher Wiederholung innerhalb von Gehirn und Rückenmark vorfinden.

Der äußerste Kreis stellt uns die Endpunkte der individuellen Wirksamkeit vor, von welchen aus Empfindungen angeregt,

elements as such. In contrast to another group of elements, these motor elements cannot give rise to sensations by themselves. I placed this second group of elements on the outer circle. These elements form functional relationships between each other and also with the motor elements located inside the inner circle. We may refer to these two groups as **motorium** and **sensorium**, but one would be wrong to think of them as being located at a specific point within the nervous system. In fact, they are widely distributed within the brain and the spinal cord.

The outermost circle of the schematic contains the results of individual effectiveness, where sensations are initiated and where impulses of the will are forwarded to from the inner circles, as indicated by the arrows.

Regarding the relationship of muscles and skeleton it is

und zu welchen hin von innen her Willensimpulse wirksam fortgeleitet werden, wie die Pfeile andeuten.

Von dem Verhältniß der Muskeln zu dem Skelet ist nur zu erwähnen, daß die Gliederbewegung von der Differenz antagonistisch einander entgegenwirkender Zugkräfte abhängig gemacht ist, wodurch bei aller Präcision und Geschwindigkeit der Bewegung doch immer eine große Weichheit gesichert, und jedes Zucken und Schnellen normal verhütet ist.

Sind nun bei der menschlichen Frucht Muskeln und Nerven so weit entwickelt, daß gewisse Aenderungen im Gleichgewicht der ihnen anvertrauten Kräfte zu wirklichen Bewegungen überhaupt führen, so entstehen solche Bewegungen, und zwar möglicher Weise durch verschiedene Veranlassungen.

Entweder es kann durch mechanische Wirkung von außen oder durch veränderte Blutmischung von innen her, oder durch ruckweises Fortbilden einzelner Nervenparthien Störung in dem Gleichgewicht der Kräfte eintreten, und zwar entweder in denen der motorischen Elemente, oder in denen der sensoriellen. Im ersteren Fall entstehen dann sogenannte direkt angeregte Bewegungen, im zweiten Fall Bewegungen, welche durch die im Schema angedeutete radiäre Verknüpfung vermittelt sind, sogenannte Reflexbewegungen. Endlich aber kann die Seele gleichsam spielend auf verschiedene Elemente des motoriums wirken, wobei dann wohl willkührliche aber doch bloß zufällige, d. h. um keines bestimmten Zweckes willen ausgeführte Bewegungen entstünden. Ich glaube, daß die letztere Art, also die zufällig vom Willen angeregten Bewegungen es in der weit größeren Anzahl von Fällen sind, welche in der ungeborenen Frucht angeregt werden; denn für Reflexbewegungen ist viel weniger Gelegenheit gegeben, da die Gleichmäßigkeit der äußeren Bedingungen schon um des normalen Wachsens willen in der Umgebung der Frucht möglichst groß gemacht ist. Das Spiel der Kinder hat in pädagogischer Beziehung eine anerkannt große Bedeutung; das Spiel des Geistes mit den motorischen Apparaten seines Nervensystems eine

only worth mentioning that limb movements are due to antagonistically acting tractive forces. This ensures precision and speed while maintaining smoothness and normally preventing undesired twitches.

Once muscles and nerves of the unborn are developed to a degree that allows certain changes in the balance of their forces yielding actual movements, such movements indeed occur, probably caused by a multitude of motives.

Either external mechanical impacts, or a modified composition of the blood, or jerks of individual parts of a nerve may disrupt the balance of forces, and this can happen either to motor or sensory elements. The former case gives rise to directly initiated movements, in the latter case reflective movements (reflexes) will occur mediated by the links from sensorium to motorium. Finally, the soul can play with the elements of the motorium thereby producing voluntary but still incidental movements that are not performed to fulfill any specific purpose. I believe that these latter movements constitute a large proportion of the unborn's movements; there is much less opportunity for reflective movements, because the environment of the unborn is held constant to ensure optimal conditions for its growing. The importance of children's play is widely acknowledged in the educational sciences; that of the soul with the motor elements of its nervous system is, however, just as important. Right after the child's birth one can observe how this play is continued. When observing carefully enough, one can frequently witness that a child systematically trains its movements in the cradle.

nicht geringere. Sehr bald nach der Geburt kann man an dem Kind eine Fortsetzung dieses Spieles wahrnehmen, und wer Acht hat, kann häufig genug sehen, wie es seine Bewegungen in der Wiege systematisch einübt.

Wie dem nun aber immer seyn mag: wird aus irgend welcher Ursache die Bewegungsform **A** im Schema hervorgerufen, so ist eine unausbleibliche Folge, daß der Akt der Bewegung eine Empfindung veranlaßt; diese Empfindung **a** muß genau die Form haben, als wenn sie durch die direkte Wechselwirkung von  $\alpha$  mit **a** entstanden, oder als wenn der Impuls für die Bewegung direkt von  $\alpha$  ausgegangen wäre. Denn geschieht das letztere, so entsteht wirklich das Empfindungsbild **a**; dieses entsteht aber auch, wenn bei einer irgend beliebigen Combination der Erregungen in **a** – **z**, verbunden mit einer beliebigen Combination im Motorium, als Resultante eben jener Effekt **A** herbeigeführt worden war.

Wir wollen nun einen beliebigen resultirenden Zustand in dem **sensorium** und einen ebenso beliebigen resultirenden Zustand in dem **motorium** annehmen, weiter voraussetzen, es würde an irgend einem Punkt, z. B. **f**, das Gleichgewicht gestört: es entstände hier eine Empfindung; vermöge der funktionellen, aber rein mechanischen Verknüpfung beider Gruppen centraler Elemente entstände die zufällige Bewegung **B**. In Folge dessen entsteht in **d** eine allein von der Bewegungsform **B** abhängige Empfindung. Für das Bewußtseyn liegt also jetzt das Empfindungsbild der veranlassenden Ursache in **f**, das Empfindungsbild der effektuirten Bewegung in **d**. Beide Bilder befinden sich also an verschiedenen, möglicher Weise sehr weit von einander entfernten Punkten. Von **f** aus ist immer nur ein Rapport mit der Gesamtgruppe des **motorium**, eigentlich in gleichem Maaß mit jedem einzelnen seiner Elemente, geboten; von **f** geht kein bestimmt vorgezeichneter Weg nach  $\delta$ , dem Ausgangspunkt für die Bewegung **B**. Die lebhafteste Reproduktion des Empfindungsbildes **f** kann also für sich noch nicht willkürlich **B** zum zweitenmal hervorrufen, wenn der Wille nicht erst auf  $\delta$  im **motorium** gelenkt worden ist.

#### 4. A physiological-psychological mechanism for voluntary actions

In any case: if the motor pattern **A** in the schematic is evoked for any reason, a particular sensation necessarily and inevitably follows the movement; this sensation **a** must be the same as if it was provoked by the direct interaction of  $\alpha$  and **a**, or if the movement was directly initiated by  $\alpha$ . In the latter case, the sensation **a** of course arises; but **a** also arises if any combination of activations in **a** – **z** combined with any activation in the motorium results in the very effect **A**.

Let us now assume an arbitrary resulting state in the **sensorium** and in the **motorium**, and let us further assume that the balance is disturbed at some point, for example **f**: a sensation would arise at this very point. And, as a consequence of the functional yet merely mechanical interconnections of both groups of central elements the incidental movement **B** follows. Consequently, then, the sensation **d** arises which only depends on the movement **B**. Thus, to our consciousness, the percept of the causing motive is **f**, while the percept of the resulting movement is **d**. Both percepts therefore may lie at different and possibly very distant points. Beginning with the percept **f**, one can only activate the **motorium** as such, or more precisely, activate each element of the **motorium** to the same degree. There is no specific and direct link from **f** to  $\delta$ , the starting point for the movement **B**. Thus, even the most vivid reproduction of the percept **f** cannot voluntarily reproduce the movement **B**, unless the will has been focused on  $\delta$  in the motorium before.

Ehe wir jetzt weiter gehen, und den Werth des Bewegungsbildes oder richtiger Effektbildes welches von **d** aus veranlaßt wird, für die willkürliche Handlung zu bestimmen suchen, ist einer vollkommen gesicherten, einfachen Thatsache aus dem Gebiet der experimentellen Physiologie Erwähnung zu thun. Hat man bei einem Thier oder bei dem Menschen irgend wie den Willenseinfluß künstlich aufgehoben, so entstehen auf äußere Reize bekanntlich so genannte Reflexbewegungen. Diese sind bedingt von der Punkt für Punkt fortschreitenden Innervation, welche vom Reiz eingeleitet wurde, und sich auf der Bahn der sensitiven Nerven durch centrale Gruppen nach dem Gebiet der motorischen Nerven fortpflanzt. Dadurch entsteht eine von der Quantität, Qualität und Oertlichkeit des Reizes streng abhängige Bewegungsform.

Von allen Eigenthümlichkeiten dieser Reflexbewegungen müssen wir hier nur Eine hervorheben. Wird ein möglichst leiser Reiz an einer Zehe angebracht, so entsteht eine auf diese Zehe beschränkte Bewegung. Reizt man in ähnlicher Weise die Haut des Bauches, so bleibt die Reflexbewegung auf die Bauchdecken beschränkt; kurz also: Ort des Reizes und Ort der Bewegung fällt dabei sehr genau zusammen. Dies setzt voraus, daß die centrale Verknüpfung von sensiblen und motorischen Nervelementen für die einzelnen anatomischen Lokalitäten am innigsten ist. In unserem Schema ist dies durch die Linie **a**  $\alpha$ , oder **d**  $\delta$  etc. angedeutet. Von dieser unumstößlichen Thatsache aus können wir jetzt in unserer Betrachtung weiter gehen.

Zwischen den Punkten **a** und  $\alpha$  besteht eine derartige Relation, daß immer von dem Empfindungsganzen (**a**) aus mit großer Leichtigkeit ein Bewegungsganzen **A** angeregt wird. Die Leichtigkeit, mit welcher dies geschieht, ist aber keine unbegrenzte, d.h. es gehört immer eine gewisse Intensität der Erregung dazu, um den Durchgang durch  $\alpha$  nach **A** zu erzwingen, um also die Bewegung wirklich zu effectuieren. Da weiter alle neueren Untersuchungen gezeigt haben, daß es im Nervensys-

#### 4.1. Preconditions and assumptions

Before moving on to further analysing the value of movement sensations and the movement's contingent sensory effects (caused by **d**), we need to mention an entirely confirmed fact from experimental physiology. If in an animal or human the influence of the will is artificially cancelled out, external stimulation results in what are called reflex movements. These reflex movements are due to the point-by-point advancing activation that is initiated by the external stimulation and proceeds through the sensory nerves and central groups to the motor nerves. The resulting movement is completely dependent on the stimulation's quality, quantity, and locality.

Of all the peculiarities of such reflex movements we need to highlight only one for the present purpose. If the most subtle stimulation is applied to a toe, then the resulting movement is restricted to this toe alone. Similarly, stimulation of the belly results in a reflex that is also limited to the belly; in other words: the locations of stimulation and movement coincide. This suggests that the central link of sensory and motor nerves is the best established for one and the same anatomical location. In our schematic, this is symbolised by the connections **a**- $\alpha$ , or **d**- $\delta$ , etc. From this irrefutable fact we can now proceed with our analysis.

The particular linkage of **a** and  $\alpha$  allows that any instance of the sensory entity **a** can easily excite the motoric entity **A**. Note, however that the amount of involved activation must exceed a particular level to certainly initiate the transition from  $\alpha$  to **A**. Furthermore, recent research has shown that the nervous pathways are never unidirectional and thus the connection of **a** and  $\alpha$  must be a bidirectional one as well. As a consequence, simple activation of  $\alpha$  can initiate excitation of **a** even though the movement **A** is never really executed.



tem keine spezifisch einseitige Leitung giebt, so muss auch die Verbindungsbrücke zwischen  $\alpha$  und **a** doppelsinniger Leitung fähig seyn: es kann also auch durch die primitive Erregung von  $\alpha$  aus eine Erregung in **a** eingeleitet werden, ohne daß es zur wirklichen Ausführung der Bewegung **A** kommt.

Durch das Spiel des Willens mit den motorischen Centren entstehen bei der Frucht und bei dem Neugeborenen die verschiedensten zufälligen Bewegungen (z. B. **A B C D** etc.). Jede solche Bewegung erzeugt ein Empfindungsbild der Bewegung (ein Effektbild) **a d h m p s w**. Die Erregung eines motorischen Centralelementes bringt, wenn sie schwach wirkt, ein ganz dumpfes Bewegungsbild durch den Rapport zwischen  $\alpha$  und **a**, oder **d** und  $\delta$  etc. hervor; wirkt sie stärker, so entstehen leise, äußerlich vielleicht gar nicht bemerkbare Bewegungen auf dem direkten Weg, z. B. von  $\alpha$  nach **A**; dadurch wird aber das Bewegungsbild schon schärfer, und ist von intensiverer Empfindung begleitet; wirkt die Erregung mit voller Kraft, so entsteht sofort von  $\alpha$  aus die Bewegung **A**, und ihr Auftreten kann so rasch und so heftig auf die Empfindungsnerven zurückwirken, daß die Empfindung gesteigerte Intensität zu gewinnen vermag. Je öfter sich der gleiche Vorgang wiederholt, je öfter eine Bewegung ausgeführt wird, desto breiter und gangbarer wird gleichsam die Straße zwischen **a** und  $\alpha$ . Ich habe dies im Schema durch verschieden dick gezogene Radien auszudrücken gesucht. Das ist ebenfalls keine Fiction! Wer einmal den Gefäßreichthum der grauen Substanz gesehen hat, wer von dem Satz **ubi irritatio, ibi affluxus** durch Tausende von Analogien überzeugt ist, wer mit uns die Folge der Willensthätigkeit als eine **irritatio** ansieht, wer endlich die wichtigen Folgen jenes **affluxus** des Blutes und der Säfte auf Ernährung und damit auf Functionsfähigkeit eines organischen Gebildes durchschaut hat, wird begreifen können, daß in Folge häufig wiederholter Wechselwirkung zwischen **a** und  $\alpha$  immer kleinere und kleinere Aenderungen des Gleichgewichtszustandes, d. h. immer schwächere Impulse ausreichen werden, die Erregung von einem Punkt auf den anderen zu übertragen. Damit steigert

#### 4.2. The role of sensory anticipations

Through the free play of the will on the motoric centres, a great variety of incidental movements results in the unborn and the newborn (e.g., **A, B, C, D**, etc.). Each of these movements causes a sensory image (effect image) of the movement (**a d h m p s w**). The excitation of a central motoric element produces, if it is weak, a very dull movement image through the connection between  $\alpha$  and **a**, or  $\delta$  and **d**, etc.<sup>6</sup> If it is stronger, weak movements, perhaps not even noticeable from the outside, result directly. The more often the same process is repeated the more often this particular movement is executed, the wider and more passable the road between **a** and  $\alpha$  becomes.<sup>7</sup> In the schematic, this is expressed by lines of differing thickness. Note that this is not fictional! Those who have ever seen the vascular richness of the gray matter, who have been convinced of the sentence **ubi irritatio, ibi affluxus**<sup>8</sup> by thousands of analogues, who acknowledge that each act of the will is an **irritatio**, who understand the importance of this **affluxus** of blood for our nutrition and thus the functionality of the organism – they will eventually understand that, as a consequence of repeated interactions of **a** and  $\alpha$ , smaller and smaller changes in the balance, i.e., successively decreased stimulations, are sufficient to carry forward activation from one point to the next. As a consequence, the sensation accompanying the voluntary evocation of a mental image becomes more vivid and, in turn, this sensation can influence the related motor elements more easily; yet, even the most vivid experience of the effect does not cause a voluntary movement, perhaps at most an involuntary and possibly undesired movement.

sich die Lebhaftigkeit der Empfindung, welche das willkürlich hervorgerufene Erinnerungsbild begleitet, damit steigert sich die Leichtigkeit, mit welcher das Erinnerungsbild auf den motorischen Heerd der zugehörigen Bewegung influirt; allein bei aller Lebhaftigkeit des Effektbildes entsteht noch keine willkürliche, höchstens eine unwillkürliche, vielleicht selbst gegen unseren Willen auftretende Bewegung.

Aber auch alle Intensität des Willens für sich macht keine Bewegung. Ich mag zehnmal mit aller Macht rufen: „ich will! ich will!“ und damit meine Willenskraft bis zum äußersten Maaß aufstacheln – es erfolgt keine willkürliche Bewegung. Soll mein Wille etwas bewirken, so muß ich wissen was ich will; außerdem entsteht nichts als höchstens ein Spiel vollkommen zufälliger, eigentlich willenloser Bewegungen, wie sie einen Theil der Geberden allerdings bedeutungsvoll begleiten.

Eine intensive Empfindung des Effektbildes ist also allerdings das primäre und unerläßliche Erforderniß für die Ausführung einer willkürlichen Bewegung, aber sie ist nicht das vollkommen Effektivende dabei.

Man versuche sich einen Buchstaben zu denken: man wird, wenn man dies thut, ein Effektbild des lautgesprochenen Buchstaben hervorrufen. Dieses Effektbild setzt sich zusammen aus der akustischen Wirkung des Lautes und Bewegungserinnerungen an Vorgänge im phonetischen Apparat, so weit von ihm aus klare Bewegungsbilder erzeugt werden können. Je höher man die Empfindung des Effektbildes durch die Aufmerksamkeit steigert, desto bestimmter fühlt man kleine Bewegungen, oder Bewegungsantriebe an Trommelfell, Kehlkopf, Zunge, etc. Man kann deutlich verfolgen, wie sich die Schärfe des Effektbildes steigert durch die Rückwirkung jener allerleisesten Bewegungen, weil ja jetzt das Hin- und Herwogen der Erregung zwischen motorischen und sensiblen Centren immer lebhafter wird. Dieser Vorgang ist es, durch welchen die Seele orientirt wird, und erfährt, gegen welchen Punkt der motorischen Centra sie ihre Thätigkeit richten muß, um, „wenn sie will“, den Buchstaben wirklich laut auszusprechen.

#### 4.3. The role of the will

However, the mere intensity of the will cannot cause a movement on its own. With all force might I shout ten times “I want! I want!”, and spur my will on acting with the maximal force – not a single voluntary movement will occur. I also have to know exactly what I want; otherwise only incidental and involuntary movements arise, similar to those accompanying gestures (although possibly in a meaningful way).

An intense sensation of the effect image is thus the primary and indispensable prerequisite for the execution of a voluntary movement, but it is not what completely effectuates the movement.<sup>9</sup>

Think for a moment of a letter: doing so will lead to the sensation of the pronounced letter. This sensation is made up of the acoustic effect of the phoneme plus memories about activity within the phonetic apparatus, inasmuch as it can produce defined movement perceptions. The more intense the effect becomes through the allocation of attention, the more one feels subtle movements or at least the drive to act with the eardrum, the larynx, the tongue, and so on. One can almost feel how the effect becomes more and more defined via the internal feedback of these subtle movements since the pacing around of activation between sensory and motor elements becomes more intense and vivid. This is the act by which the soul is oriented and knows which motor element is the critical to articulate the certain letter, if the soul “eventually wants so”.

In thousands of instances, the just described act can be observed, in particular in those cases where the precision of

In tausend Fällen kann man den eben geschilderten Vorgang in sich verfolgen, in allen jenen Fällen nemlich, in welchen es uns auf eine möglichst präzise Ausführung der Bewegung ankommt; beim Billardspiel, dem Kegelschieben, dem Gehen auf gefährlichen Wegen und dergl. Dieses, ich möchte sagen innerliche Tasten, wobei zuerst durch die Anregung der motorischen Centra mit dem Effektbild (um es kurz so auszudrücken) ganz leise Bewegungen und Bewegungstrieb hervorgerufen werden, welche sofort Bewegungsbilder erzeugen, deren Umrisse mit dem beabsichtigten Effektbild verglichen und so lange durch Suchen in den motorischen Apparaten geändert werden, bis sie mit denen des Effektbildes zusammenfallen. Erst wenn dieses geschehen ist, erfolgt die Wirkung des Willens auf die centralen motorischen Punkte, um die Bewegung auszuführen; in demselben Moment empfinden wir auch, daß wir gewollt haben. Das **irritamentum** des Willens empfinden wir aber nicht unter Vermittlung der motorischen Centra; denn diese können überhaupt für sich keine Empfindung veranlassen. Die Empfindung, daß wir gewollt haben, entsteht vielmehr aus dem jetzt kräftigen Rückschlag gegen den Ort, von dem aus das Effektbild veranlaßt worden, und aus der gleichzeitig damit zusammenfallenden Empfindung, welche die wirkliche Ausführung der Bewegung erzeugt.

Dressur und Uebung beruht auf der Verbesserung der Leistungsgüte jener Brücken, welche in unserem Schema zwischen **a** und **α** etc. liegen; und kann denkbarer Weise auch durch anatomische Hilfsmittel, d. h. durch Gewebsbildung oder Gewebsveränderung in Beziehung auf Mischung und Volum unterstützt werden. Die Folge davon wird die seyn, daß schon blasse oder unvollkommen bewußte Effektbilder den Willen im motorischen Centrum präcis orientiren, daß über jenem Zwischenvorgang, welchen wir oben mit „Hin- und Her-Tasten“ vergleichen haben, eine absolut unbemerkbare Zeit verstreicht. Man weiß, wir können die Uebung verlieren; wir

the movement is of great importance; when playing pool, when bowling, when walking a dangerous path and so on. In sum, the motor centres are first activated by an anticipated effect yielding subtle movements or a movement tendency which is compared to the intended effect. While searching through the motor centres they may be modified until they exactly match the intended effect. If and only if this is achieved, the will exerts its influence on the motor centres to execute the movement, and in the same moment we feel that we “wanted to do so”. However, we do not feel the impact of the will mediated by the motor centres, which in fact cannot even cause a sensation. The sensation of “having wanted something” results from the retrograde feedback to the source of the firstly anticipated effect and from the (proprioceptive) sensations resulting from the actual execution of the movement.

#### 4.4. Learning and relearning

Training and practice depend on the enhancement of those links connecting, e.g., **a** and **α** in the schematic; and this process may possibly be facilitated by anatomical means, i.e., through the creation of tissue or the modification of tissue composition and volume. As a consequence, even pale and only imperfectly conscious effect images are sufficient to orient the will precisely within the motor centre. In addition, the process I have above referred to as “the pacing around” of activation becomes too fast for us to become aware of it. We know that we can lose our practice; we can regain it by starting from scratch again; however, in old

können sie wieder gewinnen durch einen ganz neuen Anfang jener Orientierungsversuche; wir können uns aber z. B. in vorgerückterem Alter vielleicht auch vergebens bemühen, uns einstige Fertigkeiten wieder auf's Neue anzueignen. Abnahme des Gedächtnisses, Abnahme in der Schärfe des Effektbildes, wesentlich aber Abschwächung in der überhaupt noch gestatteten und nicht mehr zu verbessernden Wechselwirkung zwischen motorischen und sensorischen Centren kann die Ursache davon seyn.

Wir haben bis jetzt den Ausgangspunkt einer willkürlichen Bewegung in den Geist verlegt gedacht, wobei durch die Aufmerksamkeit auf den Ort, von welchem aus ein Effektbild veranlaßt werden kann, ein **irritamentum** hervorgerufen wurde. Wenn wir jetzt zu denjenigen Bewegungen übergehen, welche durch äußere Veranlassungen entstehen, so müssen wir bemerken, daß wir bis jetzt „Effekt“ gleichgesetzt dachten irgend einer schon mehr combinirten, in irgend welcher Beziehung vielleicht zweckmäßigen Bewegung.

Es träte z. B. ein äußerer Reiz so auf unsere empfindenden Nerven, daß in Folge der bis zu **c** fortgepflanzten Erregung ein Empfindungsbild vor die Seele träte. Dieses repräsentirt aber keine Vorstellung eines Effektes, wie etwa **d** oder **a**, sondern vielleicht nur die eines hell erleuchteten Gegenstandes außer uns. Vermöge der allgemein gültigen, nach allen Richtungen hin ausgebreiteten Verknüpfung von sensorischen und motorischen Centren ist es möglich, daß ohne weiteres Zuthun des Willens, ja selbst ihm entgegen, irgend eine Bewegung entsteht. Je nach dem Zustand des motorium, je nach der innigsten Beziehung zu dieser oder jener centralen motorischen Gruppe wird die Bewegung mehr den Charakter reiner Zufälligkeit, oder einer erkennbaren Beziehung zur veranlassenden Ursache zeigen. Der Erfolg der Reizung kann aber durchaus kein ganz constanter seyn. Trifft die äußere Erregung schließlich auf den Punkt **d**, oder **a**, oder **h**, so wird wegen der ganz bestimmt vorgezeichneten Verbindungsbrücke zwischen **a** und  $\alpha$  etc. ausnahmslos der bestimmte und complicirtere Effekt **A B**

age we may end in a wild-goose chase when trying to re-learn former abilities. A decrease in memory, decreased precision of the anticipated effect, and, in particular, an irreversibly decreasing quality of the interaction between sensory and motor elements can be the reasons behind this.

#### 4.5. The role of external stimulation

So far we have ascribed the initiation of a voluntary movement to the soul and the **irritamentum** that is brought about when attention is allocated to the point that initially caused the anticipation of an effect. Let us now continue with those movements that are caused by external events, and we must acknowledge that, up to now, we equated the “effect” with a more elaborate and (in some regard) purposeful movement.

For example, an external event might stimulate our sensory nerves such that the activation which is forwarded to **c** gives rise to a certain conscious percept. This percept, however, does not represent the imagination or anticipation of an effect like **d** or **a**, but only that of an illuminated object beyond our body. Due to the widespread connections of sensory and motor centres, some form of movement might be evoked without any involvement of the will or even against it. Depending on the current state of the motor centre, depending on the connections to particular motor elements, this movement can either appear as completely incidental or as having an apparent relationship to a causing event. Yet, such stimulation does not necessarily bring about the same movement in every single case. If the activation arrives at **d**, or **a**, or **h**, the existing links from **a** to  $\alpha$  etc. will invariably give rise to the specific associated effect **A B C**. This may happen without any involvement of the will, and the effect will appear the easier and following less stimulation if - metaphorically speaking - the path to the

**C** etc. veranlaßt, möglicher Weise ganz ohne Mithülfe des Willens, und erscheint um so leichter und bei geringfügiger äußerer Veranlassung, wenn, um bildlich zu reden, der Weg zum motorischen Centrum, wie bei **h**, breiter ist, als wo anders.

Gesetzt nun, es erfolgt nach Erregung von **c** irgend eine Bewegung, bei welcher sich das Bewußtseyn nur als passiver Zuschauer verhält, also unwillkürlich oder zufällig, so wird das Kind durch die darauf folgenden neuen Empfindungen nach und nach von der Zweckmäßigkeit oder Unzweckmäßigkeit der Bewegung überzeugt, anfänglich natürlich nur in Beziehung auf ihre Veranlassung angenehmer oder unangenehmer Empfindungen. Spielend lernt es zugleich Bewegungen ausführen, welche solche verhüten, die unangenehme Empfindungen erwecken. Es sey z. B. **A** eine Bewegung, welche durch ihren Effekt unter Vermittlung von **b** ein unangenehmes Gefühl hervorruft. Man sey nun bereits so weit im Bereich disponibler Bewegungsmittel orientirt, daß man sich bewußt bleibt, es verhüte die Bewegung **B** das unangenehme Gefühl dadurch, daß es den Bewegungseffekt **A** entweder gar nicht zustandekommen läßt, oder ihn entsprechend modificirt. Der äußere Impuls wirke jetzt auf **a**; es entsteht dadurch ein Effektbild, dessen unangenehme Folgen man kennt. Die in den Peripheriestücken angedeutete Verbindung zwischen **a** und **d** wird dem kein Hinderniß in den Weg legen, sofort die Erregung von jenem auf diesen Punkt zu übertragen. Damit ist, je häufiger zwischen **d** und  $\delta$  bereits eine Wechselwirkung eingeleitet worden war, um so rascher und sicherer die Orientierung im motorischen Centrum hergestellt, um dem äußeren Bewegungsimpuls eine andere als die unsprünglich durch die Verbindung von **a** und  $\alpha$  geforderte Folge zu geben. Wegen der verschiedenen Leitungsgüte auf den Verbindungswegen der motorischen und sensoriellen Centren kann es nun kommen, daß bei heftigen äußeren Impulsen die Abwehr der gefürchteten Folge oder Bewegung mehr oder weniger unvollkommen bleibt, und so entstehen so häufig jene unzweckmäßigen Be-

motor centre, as in **h**, is broader than elsewhere.

Assume now that a movement occurs after a stimulation of **c**, where consciousness is only a passive spectator (i.e., an involuntary and/or incidental movement). From the ensuing sensations, the child will step by step be convinced of whether the movement is purposeful or not, initially of course only regarding whether these sensations are comfortable or not. Easily, the child learns to execute movements that prevent other movements that would cause unpleasant sensations. In the following, I will describe a mechanism for this process, based on the assumption that movement **A** in the schematic – mediated by **b** – gives rise to an unpleasant effect. Now let us assume that somebody has gained conscious insight into the fact that movement **B** prevents the unpleasant sensation by either preventing or modifying the movement **A**. The external stimulus operates on **a**; thereby an effect sensation occurs, the unpleasant consequences of which are known. Since there is a connection from **a** to **d**, no barrier will prevent the forwarding of the activation from one to the other point. Thus, the more often an interaction of **d** and  $\delta$  occurred previously, an increasingly fast and safe orientation in the motor centre is assured, which enables the will to redirect the external impulse for the movement in order to achieve other consequences than those resulting from the link from **a** to  $\alpha$ . Since the connections between sensory and motor centres are of varying speed and quality, preventing an unpleasant movement or consequence might fail following intense external stimulation. This is how movements arise that do not fulfill any apparent purpose and might even cause harm to us against our will. This is obvious, for example, from the clumsy movements of children that they have not yet trained sufficiently.

wegungen, durch welche wir uns gegen unseren Willen Schaden zufügen, jene „Unschicklichkeiten“, wie sie bei Kindern, bei Ausführung noch nicht gehörig eingeübter Bewegungen u. dgl. vorkommen.

Um mit sicherem Takt und zweckmäßig handeln zu können ist es nothwendig, mit großer Raschheit und Präcision das Effektbild zu reproduciren, welches mit dem Empfindungsbild der veranlassenden Ursache in dem den Zwecken entsprechenden Verhältnis steht. Je häufiger dieselbe veranlassende Ursache wiederkehrt, welche allgemeinen Zweckbegriffen zufolge bestimmte Bewegungen verlangt, und demgemäß auch die geeigneten Effektbilder erzeugt, desto breiter und gangbarer wird auch auf dem sensoriellen Gebiet die Verbindungsbrücke, wie ich die an einzelnen Peripheriestücken zu versinnlichen gesucht habe. Je lockerer dieser Verband ist, desto häufiger wird es kommen, daß von dem primär erregten Punkt aus Stellen erreicht werden, an welchen ungeeignete Bewegungsbilder auftauchen. Je stärker der äußere Impuls ist, und je größer die Neigung des Willens in einer gegebenen Situation überhaupt nur Etwas zu thun, desto leichter werden die beabsichtigten Bewegungen unkorrekt ausgeführt, wegen ihrer Vermischung mit zufälligen Bewegungen, oder ganz und gar unzweckmäßig für diese Situation. So entstehen die oft lächerlichen Bewegungen in der Verlegenheit, Zerstretheit etc.

Da wir nicht anstehen dürfen anzunehmen, daß die Leichtigkeit, mit welcher sowohl z. B.  $\mathbf{z}$  mit  $\mathbf{a}$ , als  $\mathbf{a}$  mit  $\alpha$  in Wechselwirkung treten könne, wesentlich auch bedingt ist durch allmählich sich mehr ausbildende organische Hilfsmittel, wie etwa der Muskel kräftiger wird durch Uebung, so läßt es sich leicht erklären, wie auch an geköpften Thieren in Folge äußerer Reize Bewegungen auftreten können, welche mit zweckmäßigen und willkürlichen des unversehrten Thieres die größte Aehnlichkeit haben. Dazu braucht man dann keine Theilbarkeit der Seele, noch untergeordnete sonst unter einer dominirenden Seelenmonade stehende Untergeister anzunehmen, weil ja die im Schema versinnlichte Anordnung in tau-

#### 4.6. The role of the situation

In order to act competently and purposefully, it is necessary to reproduce the particular effect image fast and precisely. This effect anticipation is related to the respective causing sensation via the to-be-reached purpose. The more often a purpose is to be achieved that demands for specific movements (thereby producing suitable effects), the more passable the connections between sensory elements will become (i.e., the connections between elements on the second circle in the schematic). If such a group is rather loosely assembled it may happen more often that a primarily activated point forwards the excitation to other points that in turn give rise to improper movement sensations. The more intense the external stimulation is and the more intense the will's drive to do something is in a given situation, the more likely the intended movements will be performed incorrectly, as they are intermixed with incidental movements or even completely inappropriate in a given situation. Examples are the ridiculous movements of the embarrassed or the absent-minded.

#### 4.7. Physiological organisation

It is reasonable to further assume that the ease of interactions between  $\mathbf{z}$  and  $\mathbf{a}$  or  $\mathbf{a}$  and  $\alpha$  is also facilitated by organic changes, such as when muscles become stronger through practice. This easily explains why in beheaded animals external stimulation can give rise to movements most similar to the purposeful and voluntary movements of the intact animal. For this we do not need to rely on a divisibility of the soul or some "sub-minds" under the control of a superordinate mind, since the pattern indicated in the schematic repeats itself many thousand times within different layers of the central nervous system, while the soul – by our definition – is located exactly where it expresses itself.

senden von Querschnitten des centralen Nervensystems sich wiederholt, und unserer Voraussetzung nach die Seele da ist, wo sie sich äußert. Ebenso wenig ist aber auch anzunehmen, daß allenthalben unveränderliche, schlagfertige Mechanismen zur Ausführung bestimmter, complicirterer Bewegungen vorhanden seyn müßten.

Verfolgen wir schließlich noch die Bewegungen der Thiere. Sie besitzen denselben nervösen Apparat; sie besitzen notorisch Gedächtniß, also die Fähigkeit Empfindungs- und Effektbilder hervorzurufen; sie sind der Dressur fähig, und dadurch zunächst fremdem Willen unterthan, was aber nicht möglich ist, ohne eigenen Willen. Haben sie aber Willen, so müssen sie sich genau auf dieselbe Weise wie der Mensch in ihrem motorischen Centrum orientiren. Was bei dem Menschen selbstgewählter Zweck macht, thut bei dem dressirten Thier das Erinnerungsbild des Peitschenhiebes. Aus eigener Wahl kommt das Thier nicht über die Bewegungstendenzen zum Zweck seiner Erhaltung und Fortpflanzung hinaus; und dem entsprechend werden gewisse Verbindungswege zwischen **z** und **a**, und **a** und  $\alpha$  in unserem Schema von Haus aus schon besser geebnet seyn, in Folge dessen das Thier ohne lange Lehrzeit seine Instinkthandlungen auszuüben versteht, ohne daß eine größere Unfreiheit in den Bewegungsmöglichkeiten liegt. Denken wir uns aber alle Bewegungen von **A** bis **G** nur im Dienst eines sehr engen Kreise von Zwecken so wird uns die Lebensweise des Thieres im Ganzen sehr einförmig erscheinen, wenn auch der Reichthum der einzelnen Bewegungen nicht kleiner ist als bei dem Menschen.

In dieser ganzen Deduktion habe ich mir keine einzige Fiktion erlaubt, um eine Lücke unserer Detailkenntnisse auszufüllen, ich habe von den letzteren kein einziges Moment benutzt, welches je umgestoßen werden könnte, ich habe keine irgendwie zu beanstandende Verbindungsweise zwischen Psychischem und Somatischem postulirt, und hoffe jetzt einen bisher ganz dunkel gebliebenen physisch-psychischen Mechanismus mit bleibender Klarheit aufgedeckt zu haben. Mein Verdienst

Similarly, there is no need to assume the existence of some invariable and adroit mechanisms to execute particular and more complicated movements.

Let us finally delve into movements of the animals in more detail. Animals possess the same nervous system as humans; they come with memory, thus the ability to evoke perceptions and effects; they can be trained, i.e., they are initially submissive to a foreign will, which is not possible without own will. However, if animals possess a will, they need to orient themselves in the motor centres in the very same way as humans do. What to the human is the self-chosen purpose is the memory of a whip's lash to the trained animal. For themselves, animals can never get beyond movement tendencies for purposes of conservation and reproduction. Therefore, several links, e.g., from **z** to **a**, and from **a** to  $\alpha$  in our schematic, will at birth already be better established than others. These links allow the animal to learn their instinctive movements quickly, while the potential freedom of the animal will is not restricted by the animal's behavioural abilities. If we assume all movements from **A** to **G** only to subserve a very circumscribed number of purposes, an animal's way of live may appear monotonous to us, even though its richness of individual movements is by no means smaller than that of a human.

## 5. Conclusions

During this whole deduction I have not used any fictive idea to fill gaps in our detailed knowledge. Of the latter I have not used any argument subject to criticism, I have not postulated any objectionable link of psychological and somatic factors, and I hope to have illuminated an up to now cryptic psycho-physical mechanism. It is of course not my merit to have uncovered the single elements of this whole process. Yet, neither the emphasis on sensations nor on

ist es keineswegs, die einzelnen Momente des ganzen Herganges erst an's Licht gezogen zu haben; aber weder die Betonung des Empfindungsbildes für sich, noch die des Effektbildes, noch die der geordneten Verbindung gewisser centraler Nervengruppen konnte das Geheimniß aufdecken, wie wir uns in einem Apparat von motorischen Centren zurecht finden, deren Thätigkeit für sich unfähig ist, Empfindungen zu veranlassen, also unfähig einen dazu absolut geforderten Zustand unseres Geistes bewußt werden zu lassen.

Möge das Anziehende des Geheimnisses, welches Jeder sich selbst ist, dazu beitragen, diesem vereinzelt Capitel einer physiologischen Psychologie auch von höherem als dem physiologischen Standpunkt herab Aufmerksamkeit zu schenken.

~~~

(anticipated) effects, nor on the orderly links of particular central nerves was by itself capable to uncover the secret of how we orient ourselves within the motor centres, which are by themselves not able to elicit certain sensations, i.e., to give consciousness to an absolutely necessary state.

May the appeal of this secret, which everybody carries within him- or herself, help to attract attention to this isolated chapter of physiological psychology not only from a merely physiological but also from a much broader point of view.

~~~



## Notes

<sup>1</sup> [p. 51] Harleß refers to the 18<sup>th</sup>/19<sup>th</sup> century German philosophers Johann Gottlieb Fichte (1762-1814) and Rudolf Hermann Lotze (1817-1881). In fact, the latter author formulated an earlier version of ideomotor theory in his 1852 book *Medicinische Psychologie oder Physiologie der Seele* [Medical psychology or the physiology of the mind], published by Weidmann'sche Buchhandlung, Leipzig, Germany.

<sup>2</sup> [p. 51] A more literal translation of „willkürliche Bewegungen“ would be the term „willed movements“. However, for the sake of clarity, we use the term of “voluntary movements” or “voluntary actions” instead. We refer to actions whenever the term is used in a broader sense (e.g., including action goals and motor cognition) whereas we refer to movements whenever the focus is on the mechanisms that eventually result in muscle twitches.

<sup>3</sup> [p. 55] Harleß introduces the cryptic term “Gattungsbeußtseyen” (literally: “species awareness”) to describe phylogenetically adaptive actions. The term does not have a direct translation into modern German or English and is thus used as it stands. In order to maintain readability, we will substitute the term with the adjective “phylogenetical” whenever possible.

<sup>4</sup> [p. 59] The wording of the latter part of this sentence is adapted from Stock, A., & Stock, C. (2004). A short history of ideomotor action. *Psychological Research*, 68, 176-188 (p. 182).

<sup>5</sup> [p. 60] Although not expressed explicitly by Harleß, it is most likely that the “dualistic view” refers to the Cartesian approach to the mind-body problem as described by René Descartes.

<sup>6</sup> [p. 66] Even though Harleß referred to a connection between the nodes  $d$  and  $\delta$ , he did not include this connection in the original version of his schematic. We decided to stick to the original version and retained this inconsistency in the redrawn schematic.

<sup>7</sup> [p. 66] This paragraph was adapted from Stock, A. & Stock, C. (2004). A short history of ideomotor action. *Psychological Research*, 68, 176-188 (p. 182).

<sup>8</sup> [p. 66] “Ubi irritatio, ibi affluxus [est]” is a classical medical maxim translating to “where the irritation is, there is increased blood flow”.

<sup>9</sup> [p. 67] This paragraph was adapted from Stock and Stock (2004). A short history of ideomotor action. *Psychological Research*, 68, 176-188 (p. 182).

---

### Contact:

Roland Pfister • Markus Janczyk  
 Department of Psychology III  
 University of Würzburg  
 Röntgenring 11  
 97070 Würzburg  
 Germany

✉ roland.pfister@uni-wuerzburg.de •  
 markus.janczyk@uni-wuerzburg.de
